# Supplementary material for: The preventive effect of resiniferatoxin on the development of cold hypersensitivity induced by spinal nerve ligation: involvement of TRPM8
Source: PubMed Central journal article supplement (PMC4915067; doi:10.1186/s12868-016-0273-8), 2016-06-21
Supplement: 12868_2016_273_MOESM1_ESM.pdf [file 12868_2016_273_MOESM1_ESM.pdf]

|       |      |     |     |
|-------|------|-----|-----|
| TRPM8 | sham | SNL | RTX |
|       | 237  | 202 | 230 |
|       | 158  | 280 | 189 |
|       | 198  | 211 | 200 |

|                            |      |     |     |
|----------------------------|------|-----|-----|
| TRPM8 + NF200 merged cells | sham | SNL | RTX |
|                            | 209  | 156 | 195 |
|                            | 135  | 265 | 168 |
|                            | 171  | 178 | 172 |
