# Supplementary material for: The preventive effect of resiniferatoxin on the development of cold hypersensitivity induced by spinal nerve ligation: involvement of TRPM8
Source: PubMed Central journal article supplement (PMC4915067; doi:10.1186/s12868-016-0273-8), 2016-06-21
Supplement: 12868_2016_273_MOESM2_ESM.pdf [file 12868_2016_273_MOESM2_ESM.pdf]

Cold hypersensitivity

| control group    | Time(Week)/Animal(no.) | 1   | 2   | 3   | 4   |
|------------------|------------------------|-----|-----|-----|-----|
|                  | 0                      | 100 | 100 | 100 | 100 |
|                  | 1                      | 100 | 100 | 100 | 100 |
|                  | 2                      | 100 | 100 | 100 | 100 |
|                  | 3                      | 100 | 100 | 100 | 100 |
|                  | 4                      | 100 | 100 | 100 | 100 |
| RTX 0 ug + SNL   | 0                      | 100 | 100 | 100 | 100 |
|                  | 1                      | 5   | 7   | 3   | 11  |
|                  | 2                      | 6   | 7   | 5   | 11  |
|                  | 3                      | 9   | 7   | 6   | 14  |
|                  | 4                      | 9   | 8   | 9   | 19  |
| RTX 0.1 ug + SNL | 0                      | 100 | 100 | 100 | 100 |
|                  | 1                      | 10  | 9   | 12  | 100 |
|                  | 2                      | 12  | 9   | 13  | 100 |
|                  | 3                      | 17  | 10  | 12  | 100 |
|                  | 4                      | 23  | 100 | 15  | 100 |
| RTX 1 ug + SNL   | 0                      | 100 | 100 | 100 | 100 |
|                  | 1                      | 100 | 6   | 100 | 45  |
|                  | 2                      | 100 | 5   | 100 | 49  |
|                  | 3                      | 100 | 7   | 100 | 61  |
|                  | 4                      | 100 | 6   | 100 | 69  |

| 5   | 6   | 7   |
|-----|-----|-----|
| 100 |     |     |
| 100 |     |     |
| 100 |     |     |
| 100 |     |     |
| 100 |     |     |
| 100 | 100 | 100 |
| 8   | 100 | 25  |
| 8   | 100 | 27  |
| 9   | 100 | 100 |
| 15  | 100 | 100 |
| 100 | 100 | 100 |
| 16  | 11  | 14  |
| 15  | 13  | 12  |
| 17  | 15  | 12  |
| 20  | 17  | 13  |
| 100 | 100 | 100 |
| 100 | 8   | 100 |
| 100 | 8   | 100 |
| 100 | 11  | 100 |
| 100 | 11  | 100 |
