# Supplementary material for: The preventive effect of resiniferatoxin on the development of cold hypersensitivity induced by spinal nerve ligation: involvement of TRPM8
Source: PubMed Central journal article supplement (PMC4915067; doi:10.1186/s12868-016-0273-8), 2016-06-21
Supplement: 12868_2016_273_MOESM3_ESM.pdf [file 12868_2016_273_MOESM3_ESM.pdf]

Hot hypersensitivity

| control group    | Time(Week)/Animal(no.) | 1  | 2  | 3  | 4  |
|------------------|------------------------|----|----|----|----|
|                  | 0                      | 30 | 30 | 30 | 30 |
|                  | 1                      | 30 | 30 | 30 | 30 |
|                  | 2                      | 30 | 30 | 30 | 30 |
|                  | 3                      | 30 | 30 | 30 | 30 |
|                  | 4                      | 30 | 30 | 30 | 30 |
| RTX 0 ug + SNL   | 0                      | 30 | 30 | 30 | 30 |
|                  | 1                      | 7  | 9  | 9  | 10 |
|                  | 2                      | 9  | 10 | 8  | 11 |
|                  | 3                      | 9  | 12 | 30 | 30 |
|                  | 4                      | 10 | 12 | 30 | 30 |
| RTX 0.1 ug + SNL | 0                      | 30 | 30 | 30 | 30 |
|                  | 1                      | 7  | 17 | 24 | 30 |
|                  | 2                      | 9  | 18 | 23 | 30 |
|                  | 3                      | 14 | 28 | 24 | 30 |
|                  | 4                      | 15 | 30 | 30 | 30 |
| RTX 1 ug + SNL   | 0                      | 30 | 30 | 30 | 30 |
|                  | 1                      | 30 | 20 | 30 | 17 |
|                  | 2                      | 30 | 21 | 30 | 15 |
|                  | 3                      | 30 | 28 | 30 | 30 |
|                  | 4                      | 30 | 30 | 30 | 30 |

| 5  | 6  | 7  |
|----|----|----|
| 30 |    |    |
| 30 |    |    |
| 30 |    |    |
| 30 |    |    |
| 30 |    |    |
| 30 | 30 | 30 |
| 16 | 30 | 7  |
| 17 | 30 | 10 |
| 25 | 30 | 30 |
| 30 | 30 | 30 |
| 30 | 30 | 30 |
| 25 | 26 | 29 |
| 27 | 30 | 27 |
| 30 | 30 | 30 |
| 30 | 30 | 30 |
| 30 | 30 | 30 |
| 30 | 20 | 30 |
| 30 | 18 | 30 |
| 30 | 19 | 30 |
| 30 | 17 | 30 |
