# Supplementary material for: The preventive effect of resiniferatoxin on the development of cold hypersensitivity induced by spinal nerve ligation: involvement of TRPM8
Source: PubMed Central journal article supplement (PMC4915067; doi:10.1186/s12868-016-0273-8), 2016-06-21
Supplement: 12868_2016_273_MOESM4_ESM.pdf [file 12868_2016_273_MOESM4_ESM.pdf]

Mechanical hypersensitivity

| control group    | Time(Week)/Animal(no.) | 1     | 2     | 3     | 4     |
|------------------|------------------------|-------|-------|-------|-------|
|                  | 0                      | 15    | 15    | 15    | 15    |
|                  | 1                      | 15    | 15    | 15    | 15    |
|                  | 2                      | 15    | 15    | 15    | 15    |
|                  | 3                      | 15    | 15    | 15    | 15    |
|                  | 4                      | 15    | 15    | 15    | 15    |
| RTX 0 ug + SNL   | 0                      | 15    | 15    | 15    | 15    |
|                  | 1                      | 0.876 | 0.876 | 1.556 | 1.556 |
|                  | 2                      | 1.648 | 0.876 | 1.556 | 1.556 |
|                  | 3                      | 4.339 | 4.339 | 1.556 | 1.556 |
|                  | 4                      | 4.339 | 5.607 | 4.339 | 5.362 |
| RTX 0.1 ug + SNL | 0                      | 15    | 15    | 15    | 15    |
|                  | 1                      | 1.556 | 1.556 | 1.556 | 11.98 |
|                  | 2                      | 1.648 | 1.556 | 2.56  | 11.98 |
|                  | 3                      | 1.846 | 2.248 | 2.649 | 15    |
|                  | 4                      | 2.805 | 4.339 | 3.708 | 15    |
| RTX 1 ug + SNL   | 0                      | 15    | 15    | 15    | 15    |
|                  | 1                      | 11.98 | 6.908 | 2.805 | 11.98 |
|                  | 2                      | 11.98 | 7.432 | 2.805 | 11.98 |
|                  | 3                      | 15    | 6.738 | 2.592 | 15    |
|                  | 4                      | 15    | 6.738 | 4.339 | 15    |

| 5     | 6  | 7     |
|-------|----|-------|
| 15    |    |       |
| 15    |    |       |
| 15    |    |       |
| 15    |    |       |
| 15    |    |       |
| 15    | 15 | 15    |
| 2.805 | 15 | 4.331 |
| 2.978 | 15 | 4.331 |
| 3.117 | 15 | 4.331 |
| 4.467 | 15 | 6.738 |
| 15    | 15 | 15    |
| 11.98 | 15 | 15    |
| 11.98 | 15 | 15    |
| 11.98 | 15 | 15    |
| 13.22 | 15 | 15    |
| 15    | 15 | 15    |
| 15    | 15 | 15    |
| 15    | 15 | 15    |
| 15    | 15 | 15    |
| 11.98 | 15 | 15    |
